# Supplementary material for: Hyperoside as a UV Photoprotective or Photostimulating Compound—Evaluation of the Effect of UV Radiation with Selected UV-Absorbing Organic Compounds on Skin Cells
Source: MDPI journal article supplement (doi:10.3390/ijms24129910), 2023-06-08
Supplement: s1 [file s1]

# Hyperoside as an UV Photoprotective or Photostimulating Compound – Evaluation of the Effect of UV Radiation with Selected UV-Absorbing Organic Compounds on Skin Cells

Anna Moukova <sup>1</sup>, Lukas Malina <sup>1,2</sup>, Hana Kolarova <sup>1,2</sup> and Robert Bajgar <sup>1,2\*</sup>

<sup>1</sup> Department of Medical Biophysics, Faculty of Medicine and Dentistry, Palacky University in Olomouc, Hnevotinska 3, 775 15 Olomouc, Czech Republic; anna.moukova01@upol.cz (A.M.); lukas.malina@upol.cz (L.M.); hana.kolarova@upol.cz (H.K.)

<sup>2</sup> Institute of Molecular and Translational Medicine, Faculty of Medicine and Dentistry, Palacky University in Olomouc, Hnevotinska 3, 775 15 Olomouc, Czech Republic

\* Correspondence: robert.bajgar@upol.cz; Tel.: +420-585-632106

## Supplementary Materials: Effect of UVA radiation on fluorescence of LysoTracker Blue DND-22

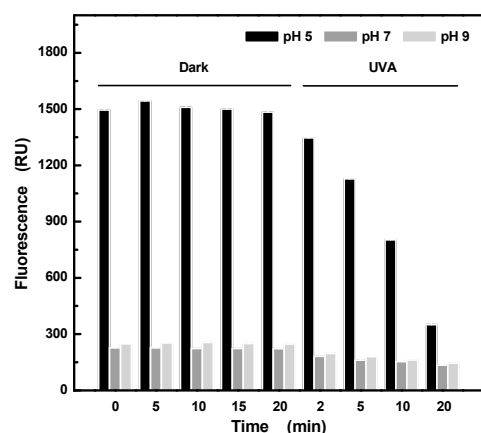

**Figure S1.** Dependence of LysoTracker Blue DND-22 fluorescence intensity on time of exposure to UVA radiation (at irradiance of 6.8 W/cm²) and pH of PBS buffer

## Spectral radiation distribution of the used UV sources

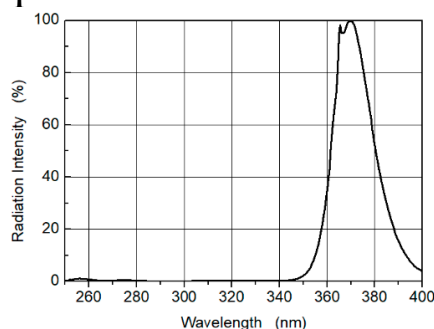

(a)

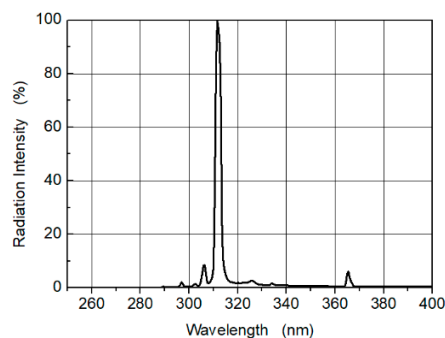

(b)

**Figure S2.** Spectral radiation intensity distribution of the used UV sources measured by the spectrofluorometer FLS980 (Edinburgh Instruments, UK): (a) broad-band UVA source; (b) narrow-band UVB source

## Absorption spectra and chemical structures of UV-absorbing compounds

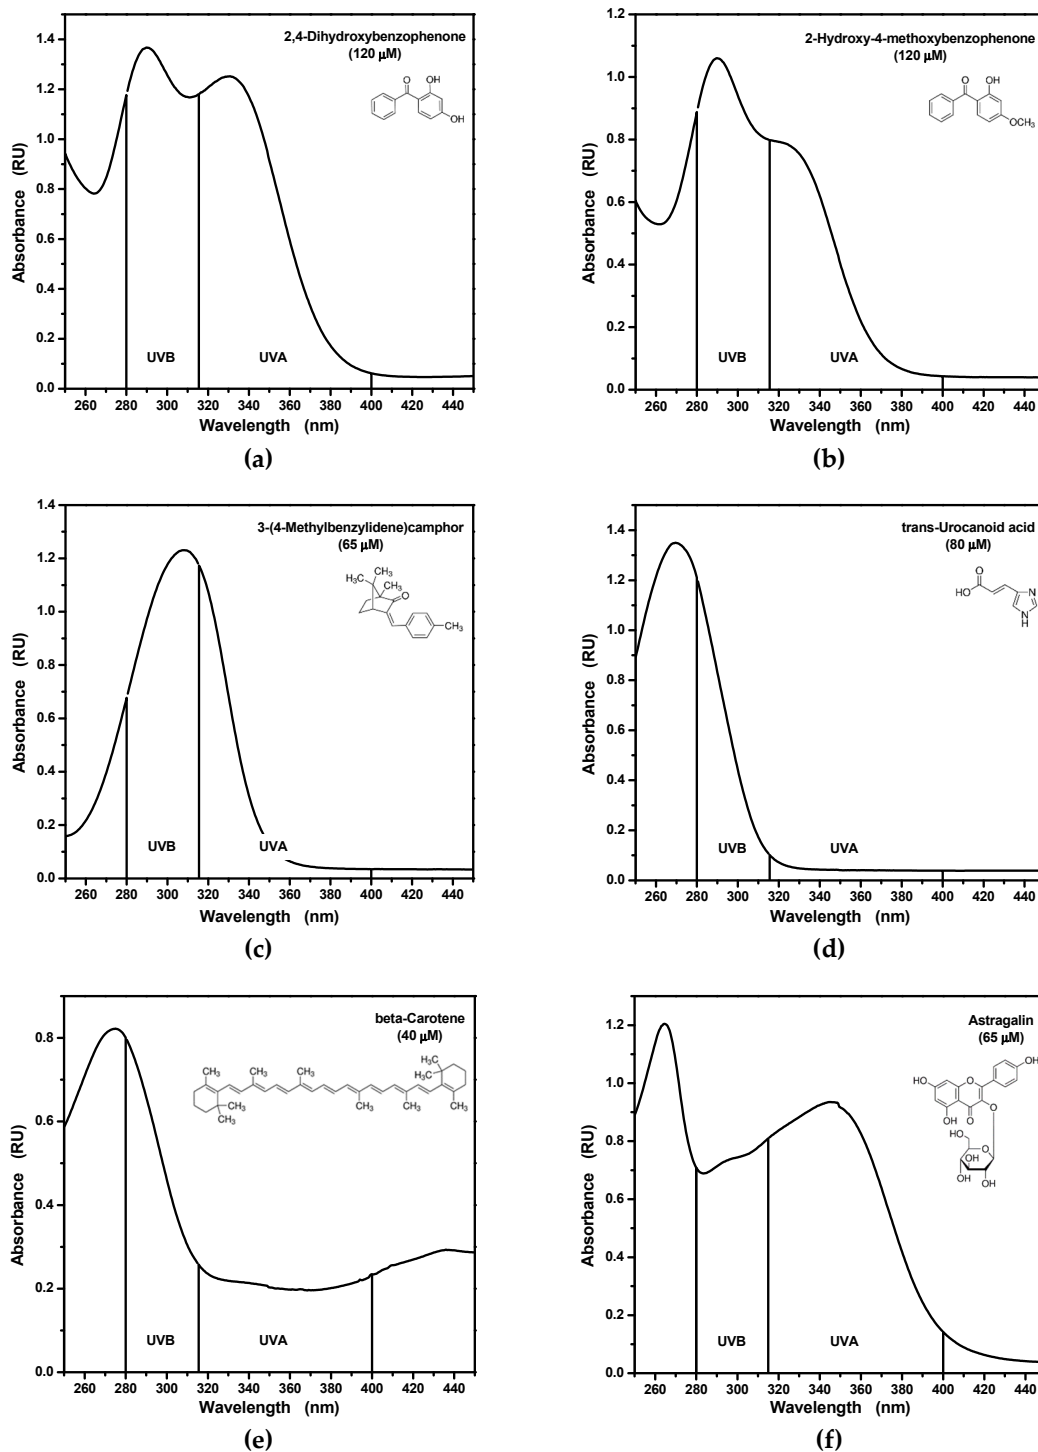

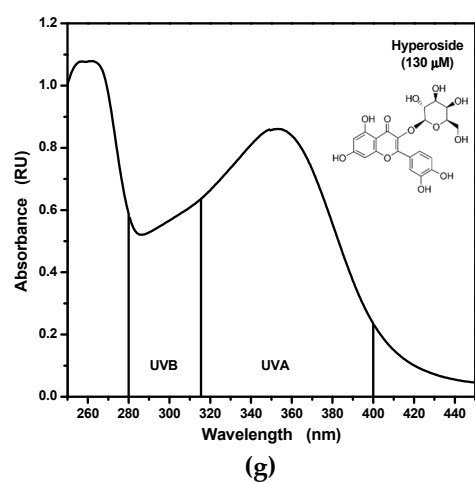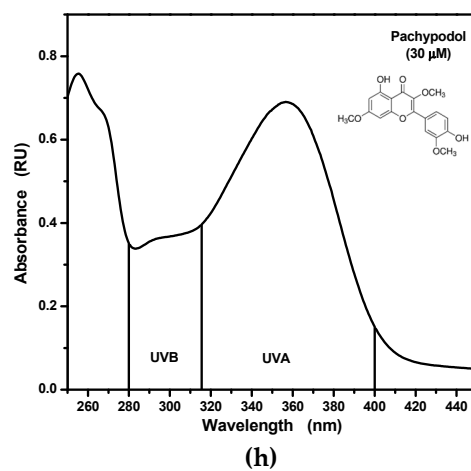

**Figure S3.** Absorption spectra of the analyzed UV-absorbing compounds: (a) 2,4-dihydroxybenzophenone; (b) 2-hydroxy-4-methoxybenzophenone; (c) 3-(4-methylbenzylidene)camphor; (d) trans-urocanic acid; (e) beta-carotene; (f) astragalin; (g) hyperoside; (h) pachypodol.
